# Supplementary material
Source: publisher figshare collection journal article supplement (https://acs.figshare.com/ndownloader/files/4717426)
Supplement: Supplementary file 1 [file 4717426]

# Phase distribution and electrochemical properties of Al-substituted nickel hydroxides

L. J. Yang<sup>a</sup>, X. P. Gao<sup>a\*</sup>, Q. D. Wu<sup>a</sup>, H. Y. Zhu<sup>b\*</sup>, G. L. Pan<sup>a</sup>

<sup>a</sup> Institute of New Energy Chemistry Material, Department of Materials Chemistry, Nankai University, Tianjin 300071, China, Email: [xpgao@nankai.edu.cn](mailto:xpgao@nankai.edu.cn)

<sup>b</sup> School of Physical and Chemical Sciences, Queensland University of Technology, Brisbane, Qld 4001, Australia, Email: [h.zhu@qut.edu.au](mailto:h.zhu@qut.edu.au)

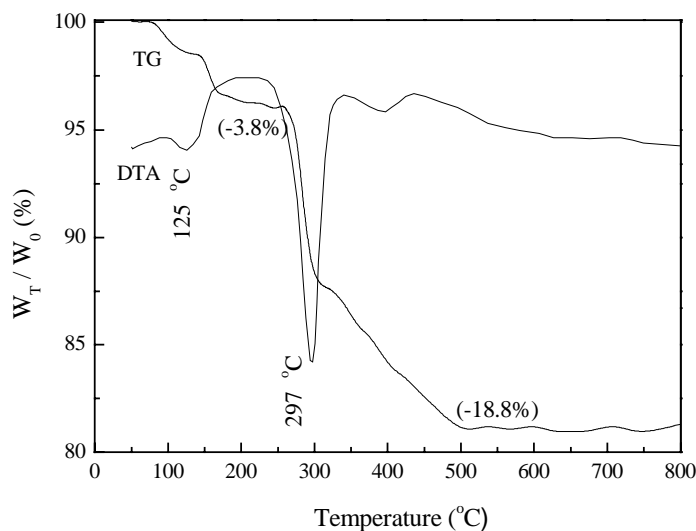

Figure S1 TG and DTA curves of the 10 mol% Al-substitution sample. The weight loss can be divided into four steps. The two steps in the range of 50-228 °C were assigned to the mass loss of the adsorption water and the structural water (3.8%), which was connected by hydrogen-bond in the layers. The mass loss in the range of 228-310 °C (8.5%) and in the range of 310-489 °C (6.5%) was attributed to the decomposition of  $\alpha$ -phase  $\text{Ni}(\text{OH})_2$  and  $\beta$ -phase  $\text{Ni}(\text{OH})_2$ , respectively.

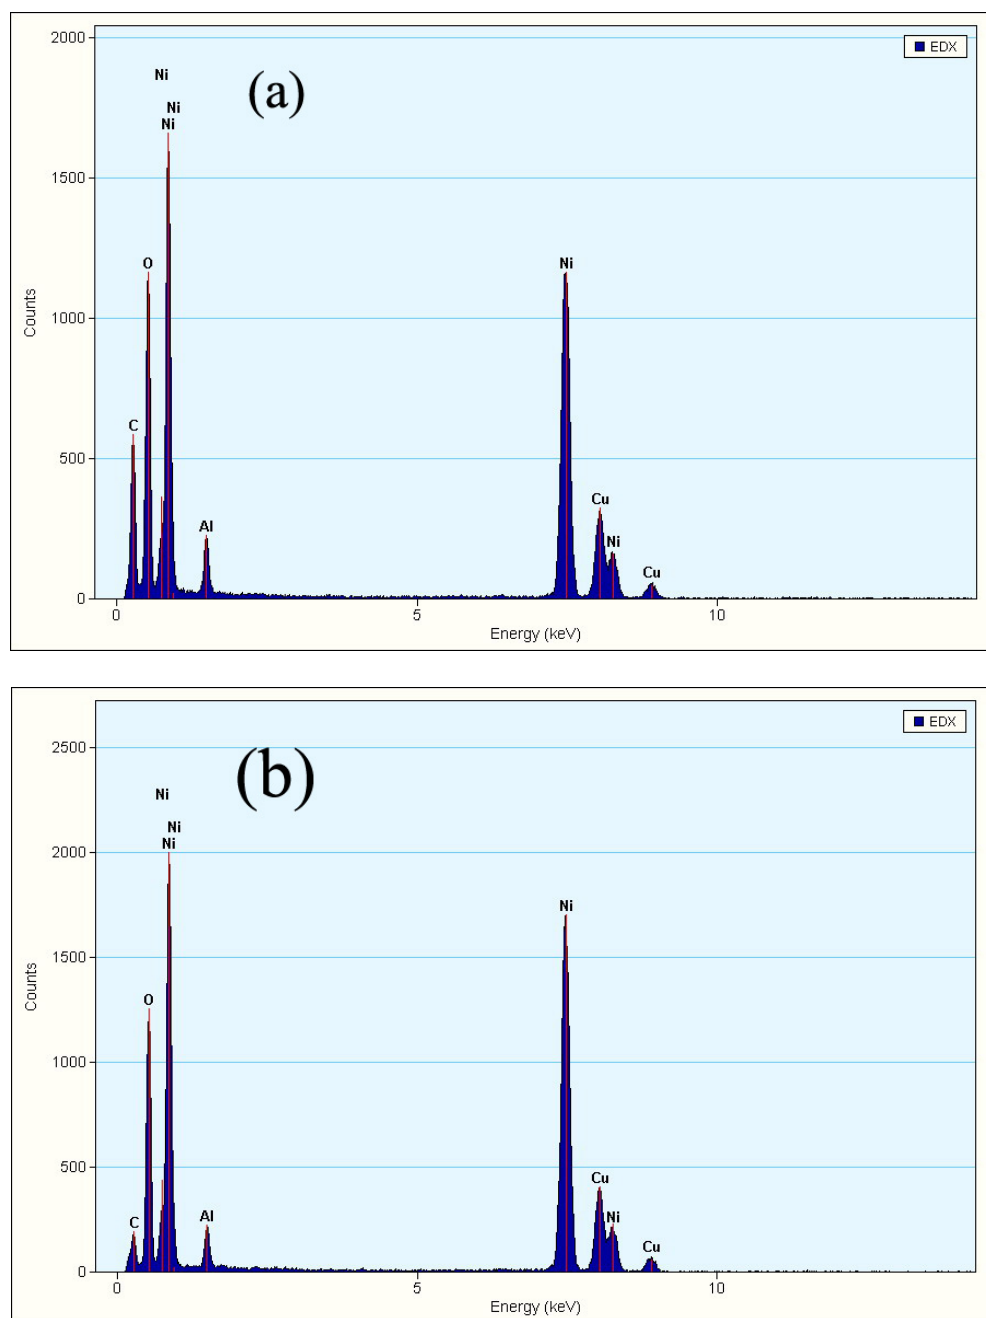

Figure S2 EDS spectra of the 10 mol% Al-substitution sample for individual  $\alpha$ -phase  $\text{Ni}(\text{OH})_2$  nanoparticles (a) and  $\beta$ -phase  $\text{Ni}(\text{OH})_2$  nanoparticles (b), respectively. EDS spectra were recorded at different spots using TEM (FEI Tacnai F20) in Tianjin University.
